# Supplementary material
Source: Springer Nature journal article supplement (https://www.springermedizin.de/resource/supplementary/13012_2011_374_MOESM7_ESM.pdf/9629884)

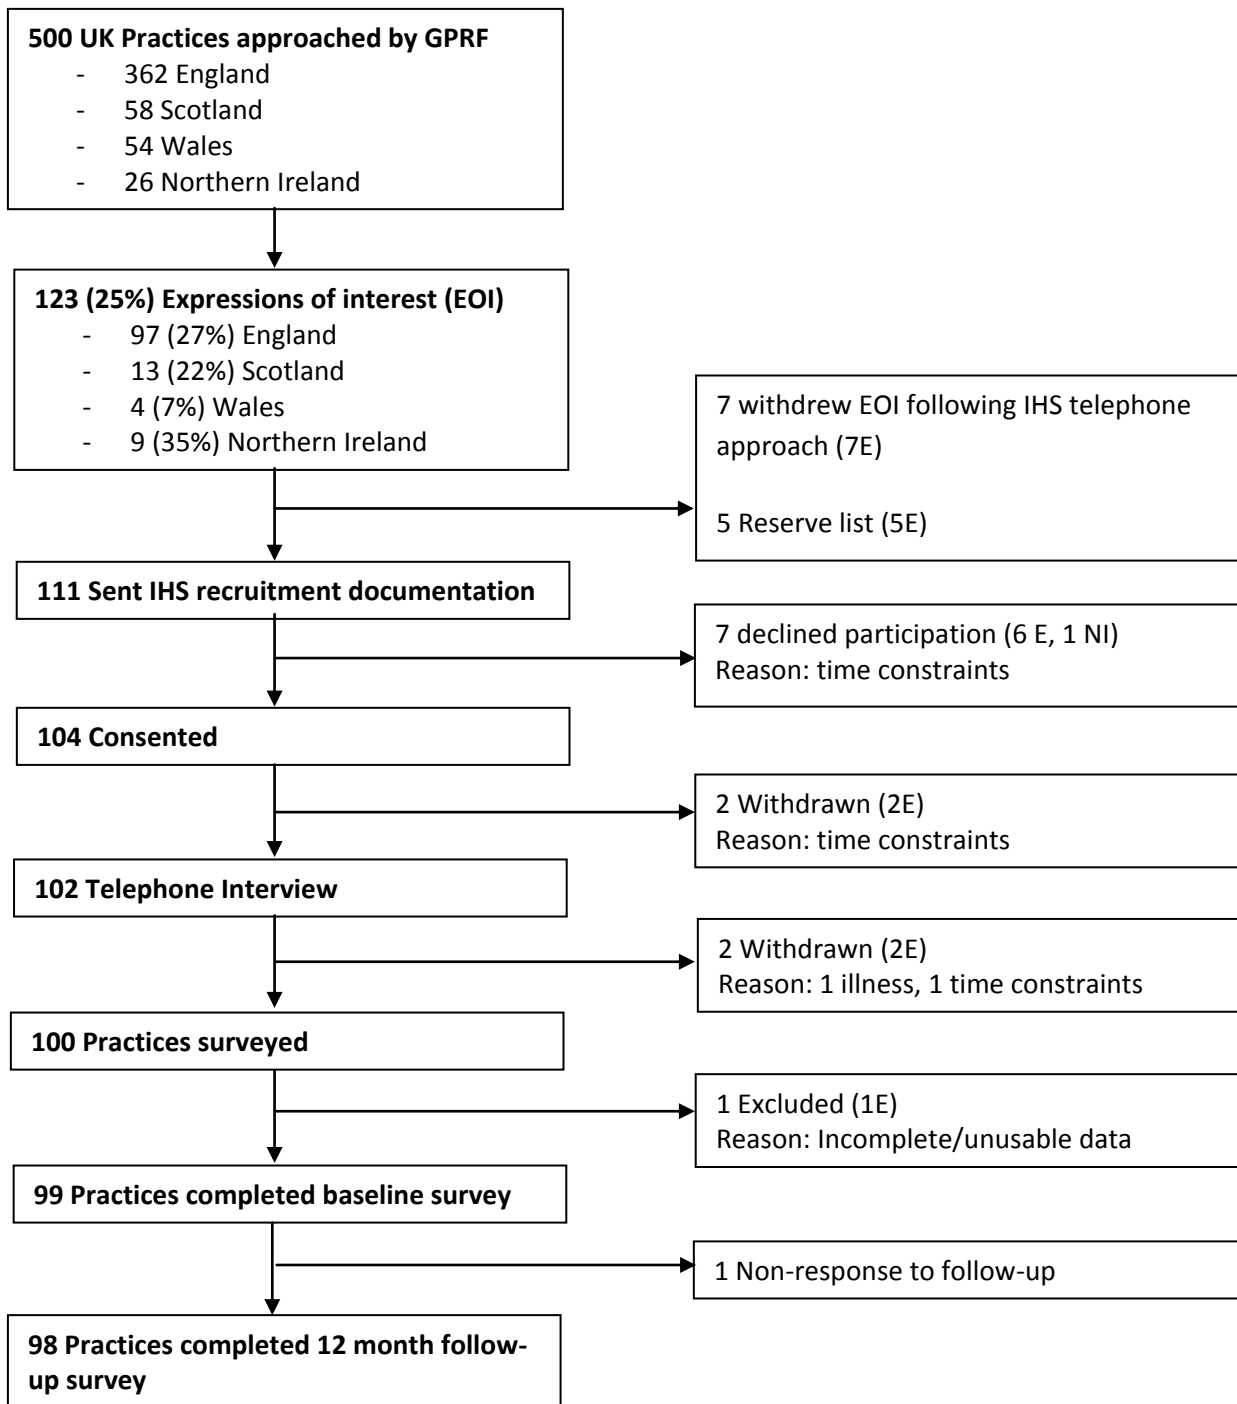

Supplement: MOESM7 [file 9629884]
